# Supplementary material for: Single neuron responses underlying face recognition in the human midfusiform face-selective cortex
Source: PubMed Central journal article supplement (PMC10499913; doi:10.1038/s41467-023-41323-5), 2023-09-13
Supplement: 41467_2023_41323_MOESM2_ESM.pdf [file 41467_2023_41323_MOESM2_ESM.pdf]

## Reporting Summary

Nature Portfolio wishes to improve the reproducibility of the work that we publish. This form provides structure for consistency and transparency in reporting. For further information on Nature Portfolio policies, see our [Editorial Policies](#) and the [Editorial Policy Checklist](#).

### Statistics

For all statistical analyses, confirm that the following items are present in the figure legend, table legend, main text, or Methods section.

| n/a                                 | Confirmed                                                                                                                                                                                                                                                                                      |
|-------------------------------------|------------------------------------------------------------------------------------------------------------------------------------------------------------------------------------------------------------------------------------------------------------------------------------------------|
| <input type="checkbox"/>            | <input checked="" type="checkbox"/> The exact sample size ( $n$ ) for each experimental group/condition, given as a discrete number and unit of measurement                                                                                                                                    |
| <input type="checkbox"/>            | <input checked="" type="checkbox"/> A statement on whether measurements were taken from distinct samples or whether the same sample was measured repeatedly                                                                                                                                    |
| <input type="checkbox"/>            | <input checked="" type="checkbox"/> The statistical test(s) used AND whether they are one- or two-sided<br><i>Only common tests should be described solely by name; describe more complex techniques in the Methods section.</i>                                                               |
| <input checked="" type="checkbox"/> | <input type="checkbox"/> A description of all covariates tested                                                                                                                                                                                                                                |
| <input type="checkbox"/>            | <input checked="" type="checkbox"/> A description of any assumptions or corrections, such as tests of normality and adjustment for multiple comparisons                                                                                                                                        |
| <input type="checkbox"/>            | <input checked="" type="checkbox"/> A full description of the statistical parameters including central tendency (e.g. means) or other basic estimates (e.g. regression coefficient) AND variation (e.g. standard deviation) or associated estimates of uncertainty (e.g. confidence intervals) |
| <input type="checkbox"/>            | <input checked="" type="checkbox"/> For null hypothesis testing, the test statistic (e.g. $F$ , $t$ , $r$ ) with confidence intervals, effect sizes, degrees of freedom and $P$ value noted<br><i>Give <math>P</math> values as exact values whenever suitable.</i>                            |
| <input type="checkbox"/>            | <input checked="" type="checkbox"/> For Bayesian analysis, information on the choice of priors and Markov chain Monte Carlo settings                                                                                                                                                           |
| <input checked="" type="checkbox"/> | <input type="checkbox"/> For hierarchical and complex designs, identification of the appropriate level for tests and full reporting of outcomes                                                                                                                                                |
| <input checked="" type="checkbox"/> | <input type="checkbox"/> Estimates of effect sizes (e.g. Cohen's $d$ , Pearson's $r$ ), indicating how they were calculated                                                                                                                                                                    |

*Our web collection on [statistics for biologists](#) contains articles on many of the points above.*

### Software and code

Policy information about [availability of computer code](#)

Data collection

Data analysis

For manuscripts utilizing custom algorithms or software that are central to the research but not yet described in published literature, software must be made available to editors and reviewers. We strongly encourage code deposition in a community repository (e.g. GitHub). See the Nature Portfolio [guidelines for submitting code & software](#) for further information.

### Data

Policy information about [availability of data](#)

All manuscripts must include a [data availability statement](#). This statement should provide the following information, where applicable:

- Accession codes, unique identifiers, or web links for publicly available datasets
- A description of any restrictions on data availability
- For clinical datasets or third party data, please ensure that the statement adheres to our [policy](#)

## Human research participants

Policy information about [studies involving human research participants and Sex and Gender in Research](#).

|                             |                                                                                                                                                                                                                                                                                                                                                                                                             |
|-----------------------------|-------------------------------------------------------------------------------------------------------------------------------------------------------------------------------------------------------------------------------------------------------------------------------------------------------------------------------------------------------------------------------------------------------------|
| Reporting on sex and gender | Number of male/female participants provided.                                                                                                                                                                                                                                                                                                                                                                |
| Population characteristics  | Epilepsy patients that had to be implanted with intracranial electrodes. 5 patients (1 male, 4 females; all right-handed; 24-42 years old).                                                                                                                                                                                                                                                                 |
| Recruitment                 | Patients were recruited based on clinical criteria - epilepsy patients candidate to epilepsy surgery. Inclusion to this project was based on the need, based on clinical criteria, to implant electrodes in the midfusiform gyrus. All patients implanted with verified implantation of the electrodes in the midfusiform gyrus were included in the study (no exclusion or selection biases were applied). |
| Ethics oversight            | local ethical committee at the University Hospital of Nancy, France (CPP Est III, N°16.02.01)                                                                                                                                                                                                                                                                                                               |

Note that full information on the approval of the study protocol must also be provided in the manuscript.

## Field-specific reporting

Please select the one below that is the best fit for your research. If you are not sure, read the appropriate sections before making your selection.

Life sciences     Behavioural & social sciences     Ecological, evolutionary & environmental sciences

For a reference copy of the document with all sections, see [nature.com/documents/nr-reporting-summary-flat.pdf](https://www.nature.com/documents/nr-reporting-summary-flat.pdf)

## Life sciences study design

All studies must disclose on these points even when the disclosure is negative.

|                 |                                                                                                                                                                                                                                                                                                           |
|-----------------|-----------------------------------------------------------------------------------------------------------------------------------------------------------------------------------------------------------------------------------------------------------------------------------------------------------|
| Sample size     | Sample size was considered sufficient after evaluating the statistical results (significant effects with $p < 0.05$ using the statistics described in the manuscript - pairwise T-test comparing baseline and response time windows). No statistical method was used to predetermine sample size.         |
| Data exclusions | No exclusions were done.                                                                                                                                                                                                                                                                                  |
| Replication     | All details are provided so that the data can be replicated. The data of the manuscript comes from 7 experiments performed in 5 subjects (2 experiments in 2 subjects and 1 experiment in the other 3 subjects). All experiments were successful at providing usable data and were included in the study. |
| Randomization   | N/A. All patients were equally considered (i.e. there were not a 'control' vs. 'treatment' comparisons), so there was no need of randomization.                                                                                                                                                           |
| Blinding        | N/A. The analyses were done with codes that run automatically on the data, so there was no subjective bias issues and no need for double blinding.                                                                                                                                                        |

## Reporting for specific materials, systems and methods

We require information from authors about some types of materials, experimental systems and methods used in many studies. Here, indicate whether each material, system or method listed is relevant to your study. If you are not sure if a list item applies to your research, read the appropriate section before selecting a response.

### Materials & experimental systems

|                                     |                                                        |
|-------------------------------------|--------------------------------------------------------|
| n/a                                 | Involvement in the study                               |
| <input checked="" type="checkbox"/> | <input type="checkbox"/> Antibodies                    |
| <input checked="" type="checkbox"/> | <input type="checkbox"/> Eukaryotic cell lines         |
| <input checked="" type="checkbox"/> | <input type="checkbox"/> Palaeontology and archaeology |
| <input checked="" type="checkbox"/> | <input type="checkbox"/> Animals and other organisms   |
| <input checked="" type="checkbox"/> | <input type="checkbox"/> Clinical data                 |
| <input checked="" type="checkbox"/> | <input type="checkbox"/> Dual use research of concern  |

### Methods

|                                     |                                                            |
|-------------------------------------|------------------------------------------------------------|
| n/a                                 | Involvement in the study                                   |
| <input checked="" type="checkbox"/> | <input type="checkbox"/> ChIP-seq                          |
| <input checked="" type="checkbox"/> | <input type="checkbox"/> Flow cytometry                    |
| <input type="checkbox"/>            | <input checked="" type="checkbox"/> MRI-based neuroimaging |

# Magnetic resonance imaging

## Experimental design

|                                 |                                                                           |
|---------------------------------|---------------------------------------------------------------------------|
| Design type                     | Face localizer experiment                                                 |
| Design specifications           | Presentation of face vs. object pictures to localize face selective areas |
| Behavioral performance measures | Passive viewing of the pictures                                           |

## Acquisition

|                               |                                                                                                                                                                                                                                                                                                                                                                                                                                                                                               |
|-------------------------------|-----------------------------------------------------------------------------------------------------------------------------------------------------------------------------------------------------------------------------------------------------------------------------------------------------------------------------------------------------------------------------------------------------------------------------------------------------------------------------------------------|
| Imaging type(s)               | MRI, fMRI                                                                                                                                                                                                                                                                                                                                                                                                                                                                                     |
| Field strength                | 3T                                                                                                                                                                                                                                                                                                                                                                                                                                                                                            |
| Sequence & imaging parameters | T1-weighted magnetization-prepared gradient-echo image (MP-RAGE) sequence (192 sagittal slices, voxel size = 1 mm isotropic; flip angle (FA) = 9°, field of view (FOV) = 256 × 256 mm <sup>2</sup> , matrix size = 256 × 256); T2*-weighted simultaneous multi-slice echo planar imaging (SMS EPI) sequence (TR = 1500 ms, TE = 34 ms, FA = 72°, FOV = 240 × 240 mm <sup>2</sup> , voxel size = 2.5 mm isotropic, matrix size = 96 × 96, interleaved), which acquired 44 oblique-axial slices |
| Area of acquisition           | whole brain                                                                                                                                                                                                                                                                                                                                                                                                                                                                                   |
| Diffusion MRI                 | <input type="checkbox"/> Used <input checked="" type="checkbox"/> Not used                                                                                                                                                                                                                                                                                                                                                                                                                    |

## Preprocessing

|                            |                                                                                                                                                                                                                                                                                                                                                                                                                                     |
|----------------------------|-------------------------------------------------------------------------------------------------------------------------------------------------------------------------------------------------------------------------------------------------------------------------------------------------------------------------------------------------------------------------------------------------------------------------------------|
| Preprocessing software     | MCFLIRT; FSL                                                                                                                                                                                                                                                                                                                                                                                                                        |
| Normalization              | Data not normalized (analyses in individual brain space)                                                                                                                                                                                                                                                                                                                                                                            |
| Normalization template     | Data not normalized                                                                                                                                                                                                                                                                                                                                                                                                                 |
| Noise and artifact removal | motion-corrected with reference to the average image of the first functional run using a 6-degree rigid body translation and rotation using a motion correction software (MCFLIRT; <a href="http://www.fmrib.ox.ac.uk/fsl">www.fmrib.ox.ac.uk/fsl</a> ), and spatially smoothed with a Gaussian kernel of 3 mm (FWHM; i.e. full width at half maximum). Linear trends from the preprocessed time series of each voxel were removed. |
| Volume censoring           | The functional runs were motion-corrected with the mean image of the first experimental run with 6 degrees of rigid body translation and rotation via an intra-modal volume linear registration with the FMRIB Software Library (FSL, version 5.0.8, Smith et al. 2004).                                                                                                                                                            |

## Statistical modeling & inference

|                                                                           |                                                                                                                                                                                                                                                                                                                                                                                                                                |
|---------------------------------------------------------------------------|--------------------------------------------------------------------------------------------------------------------------------------------------------------------------------------------------------------------------------------------------------------------------------------------------------------------------------------------------------------------------------------------------------------------------------|
| Model type and settings                                                   | Univariate. Model-free analysis: Fourier Transform (Gao et al., 2018)                                                                                                                                                                                                                                                                                                                                                          |
| Effect(s) tested                                                          | Only face-selective responses measured.                                                                                                                                                                                                                                                                                                                                                                                        |
| Specify type of analysis:                                                 | <input type="checkbox"/> Whole brain <input checked="" type="checkbox"/> ROI-based <input type="checkbox"/> Both                                                                                                                                                                                                                                                                                                               |
| Anatomical location(s)                                                    | Functional ROIs                                                                                                                                                                                                                                                                                                                                                                                                                |
| Statistic type for inference<br>(See <a href="#">Eklund et al. 2016</a> ) | Cluster-wise. Response was considered as face-selective if the Z-score at the frequency bin of face stimulation exceeds 3.09 (i.e., $p < .001$ one-tailed: signal > noise).                                                                                                                                                                                                                                                    |
| Correction                                                                | We do not test the whole brain or a large region of interest. Instead, we have a highly constrained hypothesis to test a small volume around the estimated position of the microelectrodes (with a minimum of 10 2.5 × 2.5 × 2.5 mm <sup>3</sup> voxels), so there is no need for multiple comparison correction. Note that a stringent criterion, with $p < 0.001$ (all 5 individual Z-scores for the peak > 3.09), was used. |

## Models & analysis

|                                     |                                                                       |
|-------------------------------------|-----------------------------------------------------------------------|
| n/a                                 | Involved in the study                                                 |
| <input checked="" type="checkbox"/> | <input type="checkbox"/> Functional and/or effective connectivity     |
| <input checked="" type="checkbox"/> | <input type="checkbox"/> Graph analysis                               |
| <input checked="" type="checkbox"/> | <input type="checkbox"/> Multivariate modeling or predictive analysis |
